# Supplementary material for: miR-29a-5p Alleviates Traumatic Brain Injury- (TBI-) Induced Permeability Disruption via Regulating NLRP3 Pathway
Source: Hindawi journal article supplement (doi:10.1155/2021/9556513), 2021-11-28
Supplement: f1 [file 9556513.f1.pdf]

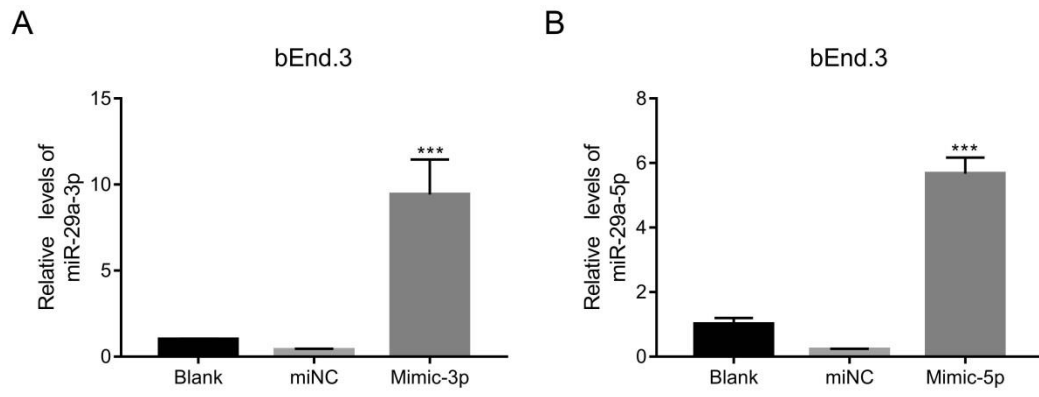

Figure S1: miR-29a-3p or miR-29a-5p mimics significantly improved the expression of miR-29a-3p or miR-29a-5p respectively in mouse bEnd.3 cells. \*\*\*  $p < 0.001$  compared with miNC.

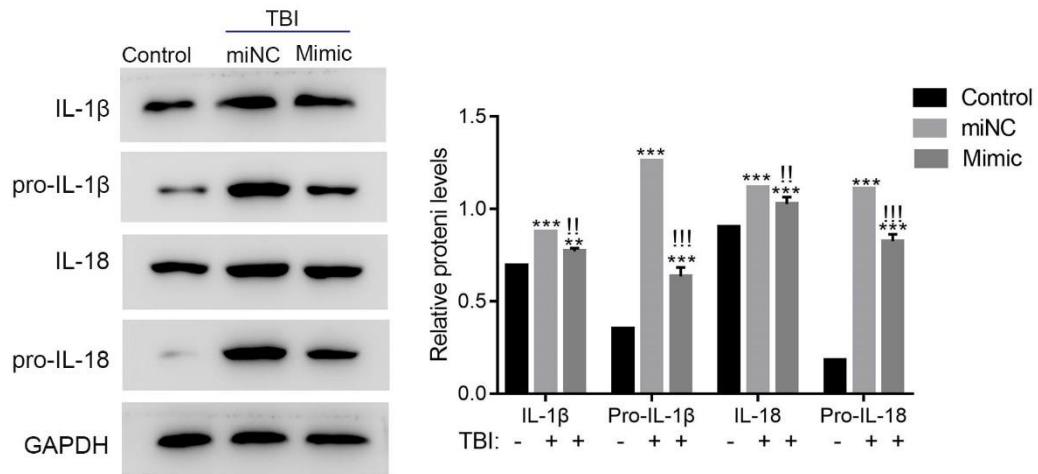

Figure S2: The miR-29a-5p mimic suppressed the protein expression of IL-1  $\beta$  and IL-18 in mouse brain tissues of TBI. \*\*  $p < 0.01$  vs control, \*\*\*  $p < 0.001$  vs control; !!  $p < 0.01$  vs miNC, !!!  $p < 0.001$  vs miNC.
